# Supplementary material
Source: publisher site journal article supplement (https://www.dovepress.com/article/432262)
Supplement: Supplementary file 1 [file get_supplementary_file.php]

## Supplemental Figure 1.

The screenshot displays the Epic EHR interface for a Best Practice Advisory (BPA). The main window shows a warning: "WARNING: Days Supply Exceeds 3 Days for Opioid Rx". The advisory text reads: "Michigan Medicine recommends opioid prescriptions not exceed 3 day supply (~15-18) pills for the following procedure(s): Case Request Panel 1 Primary Surgeon: [REDACTED] Procedure: VAGINAL HYSTERECTOMY". It provides instructions on how to manage the alert, including options to "Remove", "Keep", "Apply the following?" (with buttons for "Open Order Set" and "Do Not Open"), and "Acknowledge Reason". A red box highlights the text "Disp-30 tablet, R-0" in the "New Outpatient Orders" section on the right. The interface also shows navigation tabs at the top, a sidebar with "Discharge" and "Order Sets" sections, and a bottom bar with "Remove All", "Pend", and "Sign" buttons.

### Supplemental Figure 1. Best practice alert (BPA) in Epic electronic health record.

The BPA interface presented a link to the Opioid Prescribing Engagement Network (OPEN) guidelines, custom gynecology postoperative discharge order set containing default options for both oral non-opioid and opioid pain medications, and additional medications including oral anti-emetics and laxatives. Providers could 1) cancel the alert and change the dispense quantity to less than or equal to 15 tablets/pills; (2) remove the opioid order in progress and open a gynecology order set with defaulted medication options; or (3) override the alert.

## Supplemental Information.

# Gynecologic Best Practice Alert Qualtrics Survey

Summer 2021

**Target Audience:** Surgical care providers at Michigan Medicine (attendings, fellows, residents, APPs).

**Future Plans:** Use learned knowledge to inform prescribing practices and surgical patients' transitions of care.

### Introduction:

- The purpose of this Qualtrics Survey is to understand current practices and attitudes towards the use of a clinical support decision tool best practice alert for gynecologic post-discharge opioid prescribing following hysterectomy.
- This Qualtrics Survey will take approximately 5 minutes.
- It will be recorded, with your permission, to permit data aggregation and analysis.
- All of your responses will be kept strictly confidential and will be de-identified for the purposes of data analysis and interpretation.

## General Best Practice Alert Questions

**Provider Recall of the Best Practice Alert:** First, we would like to gain a better understanding of your recollection of this gynecologic post-discharge opioid prescribing best practice alert.

Between the months of October 2019 and February 2021, the gynecologic post-discharge opioid prescribing best practice alert displayed below fired for your account in the Epic electronic health record.

The screenshot displays the Epic electronic health record interface. The main window shows a Best Practice Alert (BPA) titled "Important (1) WARNING: Days Supply Exceeds 3 Days for Opioid Rx". The alert text reads: "Michigan Medicine recommends opioid prescriptions not exceed 3 day supply (-15-18) pills for the following procedure(s):". The procedure listed is "VAGINAL HYSTERECTOMY". The alert provides instructions on how to manage the order, including options to "Remove", "Keep", or "Apply the following?". The "Apply the following?" section includes "Open Order List", "Do Not Open", and "OTN Postop Discharge Medication Order Set Preview". The "Remove the following orders?" section lists "oxyCODONE 5 mg tablet" with a quantity of "Disp: 30 tablet 0-0". The alert also includes a "Please take one of the actions below" section with bullet points: "The order set below contains recommended pain medications and defaulted pill counts for laparoscopic and vaginal hysterectomy procedures", "The dispense quantity of the order in progress can be adjusted by cancelling this alert", and "If this patient requires a greater supply than recommended, please document the reason below". The alert is displayed in a yellow box with a red border. The interface also shows a sidebar with "Discharge" and "New Outpatient Orders" sections.

The best practice alert was designed to fire whenever a prescribing surgeon's post-discharge opioid orders were in excess of guideline recommendations. For the duration of its implementation, the best practice alert presented a link to the Michigan Opioid Prescribing Engagement Network guidelines, custom-built gynecology postoperative discharge order set containing defaulted prescription order options for both oral non-opioid and opioid pain medications, and additional medications including oral anti-emetics and laxatives. You had multiple prescribing options when interacting with the best practice alert once it fired:

1. Cancel the alert and change the dispense quantity to < 15 tablets/pills OR
2. Remove the opioid order in progress and open a gynecology order set with defaulted medication options OR
3. Override the alert

You were one of the surgeons for whom the best practice alert fired, and we would like to learn more about your impressions of this best practice alert.

1. Do you remember this event? (**Forced response**)

- 0 = No
- 1 = Yes
- 2 = Unsure

a. What was the initial reason for which your prescription was higher than the guideline recommendations for hysterectomy from the Michigan Opioid Prescribing Engagement? (Choose all that apply) (**Forced response**)

1. 1 = Was not aware of guidelines
  2. 2 = My personal practice and/or the practice of my attending physician recommends to prescribing a higher quantity
  3. 3 = Concerns for pain control
  4. 4 = Patient inability to use alternative treatments
  5. 5 = Do not remember details
1. Free response

b. Before you wrote this prescription, were you aware of the Michigan Opioid Prescribing Engagement Network and other organizations' prescribing recommendations for hysterectomy (<https://michigan-open.org/prescribing-recommendations/>)? (**Forced response**)

1. 0 = No
2. 1 = Yes
3. 2 = Unsure

**\*Note: If "yes" was selected for Q1, continue to review the document as follows. If "no" or "Unsure" were selected for Q1, please see the end of the document for the questions these providers will see/answer\***

**\*If yes was selected\***

## **Provider Satisfaction with the Best Practice Alert**

**Provider Perspectives:** For these next questions, we will be asking about your personal experience interacting with the best practice alert since its introduction into the EHR.

1. I found this best practice alert to be clinically useful for post-discharge opioid prescribing after hysterectomy. **(Forced response)**
  - a. 1 = Strongly agree
  - b. 2 = Moderately agree
  - c. 3 = Slightly agree
  - d. 4 = Neutral
  - e. 5 = Slightly disagree
  - f. 6 = Moderately disagree
  - g. 7 = Strongly disagree
  - h. 8 = Unsure

Please elaborate. **(Optional)**

---

---

2. This best practice alert increased my awareness and knowledge of the prescribing guidelines from Michigan Opioid Prescribing Engagement Network and Michigan Surgical Quality Collaborative. **(Forced response)**
  - a. 1 = Strongly agree
  - b. 2 = Moderately agree
  - c. 3 = Slightly agree
  - d. 4 = Neutral
  - e. 5 = Slightly disagree
  - f. 6 = Moderately disagree
  - g. 7 = Strongly disagree
  - h. 8 = Unsure

Please elaborate. **(Optional)**

---

---

3. This best practice alert made me consider my own post-discharge opioid prescribing habits. **(Forced response)**
  - a. 1 = Strongly agree
  - b. 2 = Moderately agree
  - c. 3 = Slightly agree
  - d. 4 = Neutral
  - e. 5 = Slightly disagree

- f. 6 = Moderately disagree
- g. 7 = Strongly disagree
- h. 8 = Unsure

Please elaborate. **(Optional)**

---

---

### **Best Practice Alert Improvement**

**Interface/Workflow Preferences:** There are many ways to interact with the EHR. We are interested in learning more about your experience with and preferences for the best practice alert.

1. If future iterations of this best practice alert were to be integrated into the clinical workflow, what aspects of its quality and/or interface would you change, if any? Any other suggestions? **(Optional)**
- 
- 

**Future Applications:** Please indicate your preferences for the future use of this best practice alert.

1. I believe this best practice alert would be beneficial for other procedure/surgery types in the future. **(Forced response)**
  - a. 1 = Strongly agree
  - b. 2 = Moderately agree
  - c. 3 = Slightly agree
  - d. 4 = Neutral
  - e. 5 = Slightly disagree
  - f. 6 = Moderately disagree
  - g. 7 = Strongly disagree
  - h. 8 = Unsure

Please explain. **(Optional)**

---

---

**\*If no or unsure was selected\***

### **Provider Satisfaction with the Best Practice Alert**

**Provider Perspectives:** For these next questions, we will be asking about your perspectives on interacting with the best practice alert described.

4. The best practice alert described would be clinically useful for post-discharge opioid prescribing after hysterectomy. **(Forced response)**
- a. 1 = Strongly agree
  - b. 2 = Moderately agree
  - c. 3 = Slightly agree
  - d. 4 = Neutral
  - e. 5 = Slightly disagree
  - f. 6 = Moderately disagree
  - g. 7 = Strongly disagree
  - h. 8 = Unsure

Please elaborate. **(Optional)**

---

---

5. The best practice alert described would increase my awareness and knowledge of the prescribing guidelines from Michigan Opioid Prescribing Engagement Network and Michigan Surgical Quality Collaborative. **(Forced response)**
- a. 1 = Strongly agree
  - b. 2 = Moderately agree
  - c. 3 = Slightly agree
  - d. 4 = Neutral
  - e. 5 = Slightly disagree
  - f. 6 = Moderately disagree
  - g. 7 = Strongly disagree
  - h. 8 = Unsure

Please elaborate. **(Optional)**

---

---

6. The best practice alert described would make me consider my own post-discharge opioid prescribing habits. **(Forced response)**
- a. 1 = Strongly agree
  - b. 2 = Moderately agree
  - c. 3 = Slightly agree
  - d. 4 = Neutral
  - e. 5 = Slightly disagree
  - f. 6 = Moderately disagree
  - g. 7 = Strongly disagree
  - h. 8 = Unsure

Please elaborate. **(Optional)**

---

---

### **Best Practice Alert Improvement**

**Interface/Workflow Preferences:** There are many ways to interact with the EHR. We are interested in learning more about your preferences for the best practice alert described.

2. If future iterations of the best practice alert described were to be integrated into the clinical workflow, what aspects of its quality and/or interface would you change, if any? Any other suggestions? **(Optional)**
- 
- 

**Future Applications:** Please indicate your preferences for the future use of the best practice alert described.

2. I believe this type of best practice alert would be beneficial for other procedure/surgery types in the future. **(Forced response)**
  - a. 1 = Strongly agree
  - b. 2 = Moderately agree
  - c. 3 = Slightly agree
  - d. 4 = Neutral
  - e. 5 = Slightly disagree
  - f. 6 = Moderately disagree
  - g. 7 = Strongly disagree
  - h. 8 = Unsure

Please explain. **(Optional)**

---

---

**Supplemental Information. Qualtrics survey assessing provider/user satisfaction with the best practice alert (BPA).** Five-minute Qualtrics survey distributed to resident physicians for whom the BPA triggered, inquiring about individual perspectives, interface preferences, and QI barriers/facilitators of the BPA.

\*QI: Quality Improvement; †BPA: Best Practice Alert

## Supplemental Figure 2.

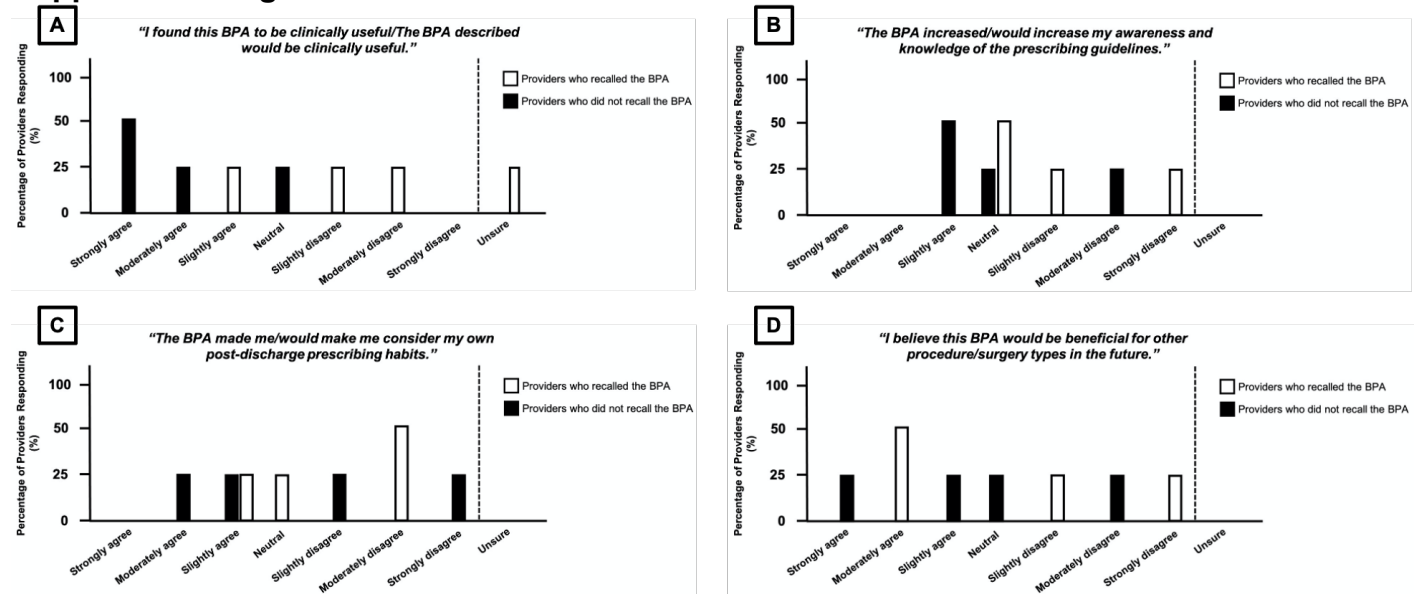

### Supplemental Figure 2A-D.

#### Healthcare Providers' Views on the Post-Discharge Opioid Prescribing Best Practice Alert (BPA).

Providers recalling the BPA (n=4) had mixed views: 25% found it slightly clinically useful; 50% were neutral regarding the BPA increasing guideline awareness; 50% moderately disagreed the BPA would cause changes to personal prescribing habits; and 50% moderately agreed the BPA would be beneficial for other procedure/surgery types. Providers that did not recall the BPA trigger (n=4) showed positive responses: 50% strongly agreed on the BPA's clinical usefulness; 50% slightly agreed on the BPA increasing guideline awareness; responses were varied regarding changes to personal prescribing habits and benefit for other procedure/surgery types. The dashed line represents a division between those providers who responded versus those who were unsure about the statement.

\*BPA: Best Practice Alert
